# Supplementary material for: Morphology controlled synthesis of Al doped ZnO nanosheets on Al alloy substrate by low-temperature solution growth method
Source: Royal Society of Chemistry journal article supplement (doi:10.1039/c4ra14049d), 2015-01-01
Supplement: c4ra14049d1.pdf [file c4ra14049d1.pdf]

## Supplementary information

S1:

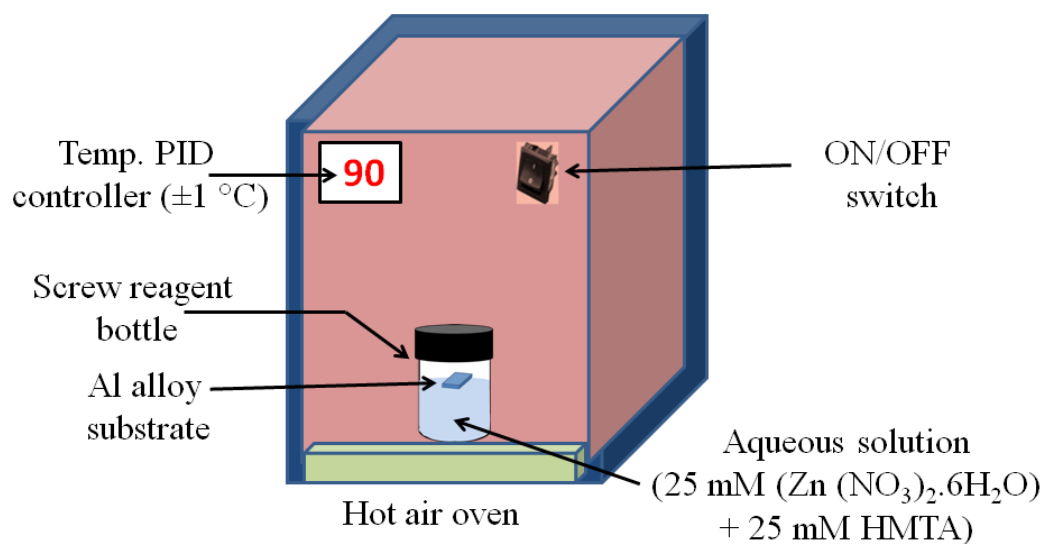

Figure S1: Block diagram of the experimental set up for synthesis process.

S2:

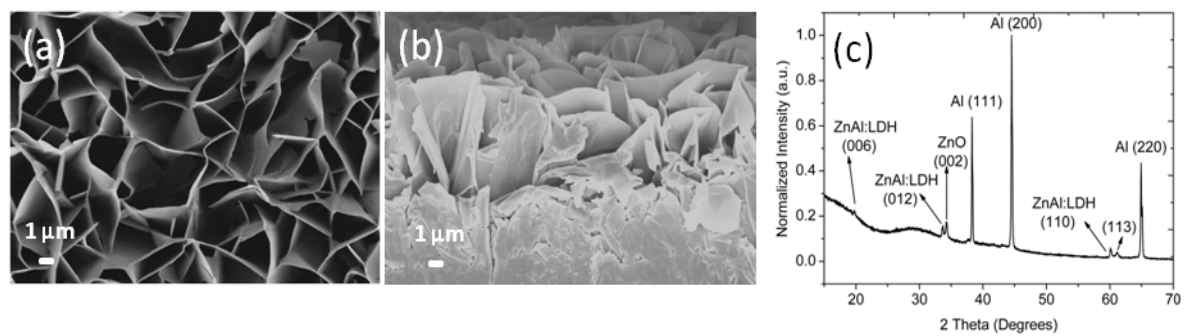

Figure S2: FE-SEM image of 2D ZnO nanosheets at growth temperature of 95 °C (a) Top view, (b) Cross sectional view, (c) XRD pattern.

S3:

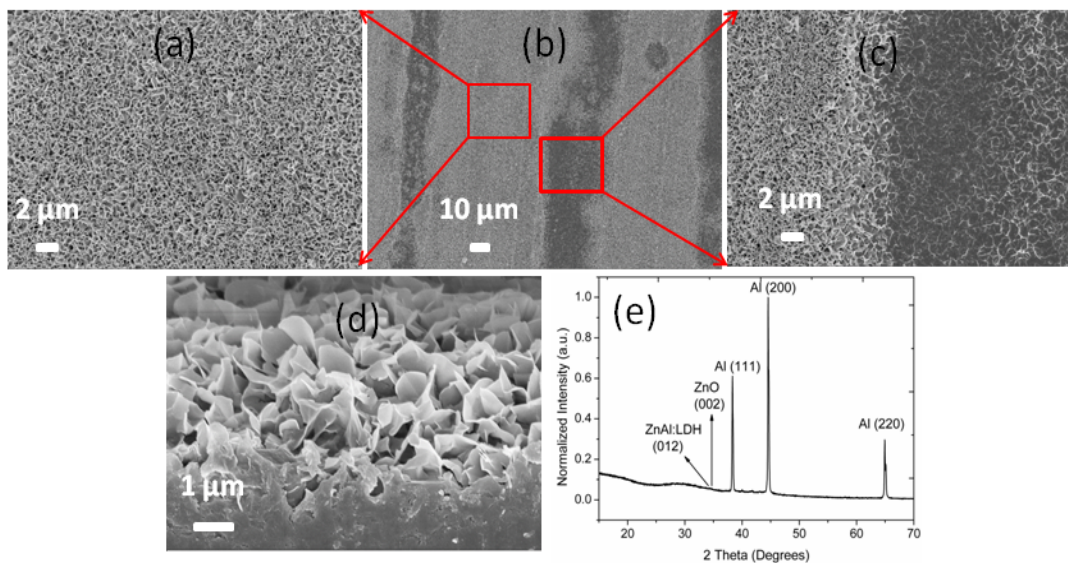

Figure S3: FE-SEM image of 2D ZnO nanosheets at growth temperature of 50 °C: (a) Uniform growth of ZnO nanosheets, (b) ZnO nanosheets at lower magnification, (c) Non-uniform growth of ZnO nanosheets, (d) Cross sectional view of ZnO nanosheets, (e) Corresponding XRD pattern.

S4:

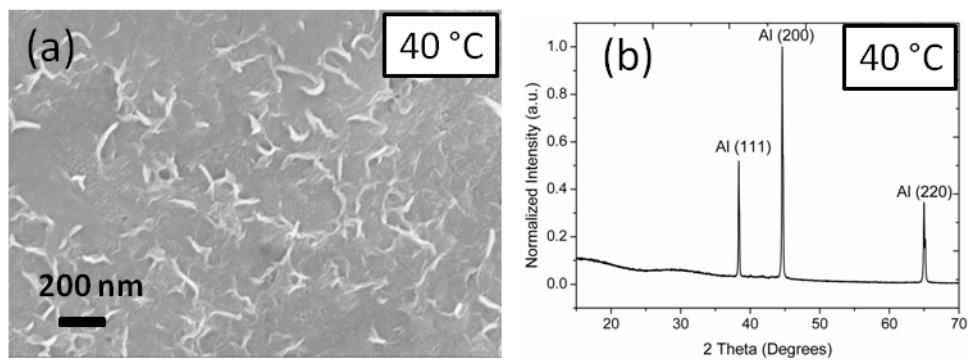

Figure S4: (a) FE-SEM image of the film for the growth temperature of 40 °C, (b) Corresponding XRD pattern.

S5:

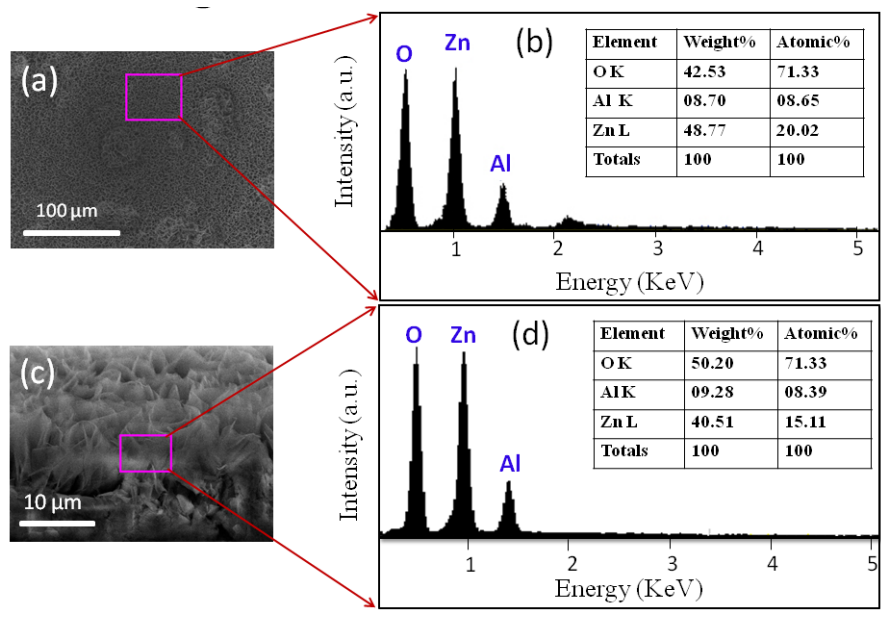

Figure S5: EDX of as grown 2D ZnO nanosheets on Al alloy substrate (a-b) Top view of ZnO nanosheets and its elemental composition (c-d) Cross-sectional view of ZnO nanosheets and its elemental composition.

S6:

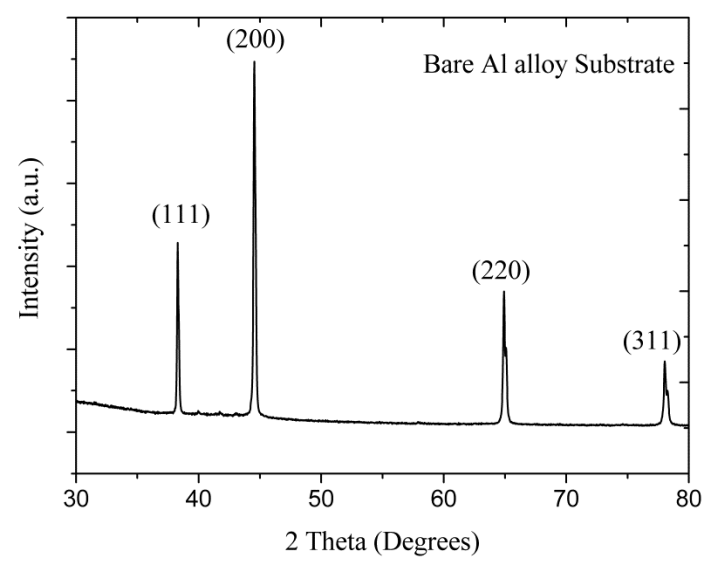

Figure S6: XRD pattern of bare Al alloy substrate (JCPDF card # 85-1327)

S7:

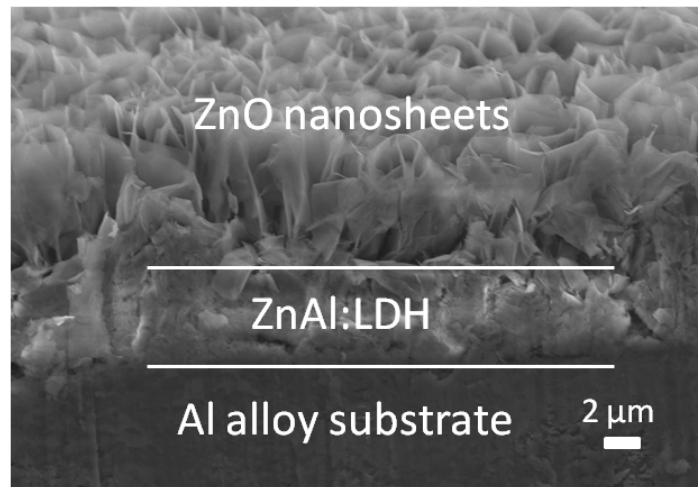

Figure S7: Formation of ZnAl:LDH of 2D ZnO nanosheets.

S8:

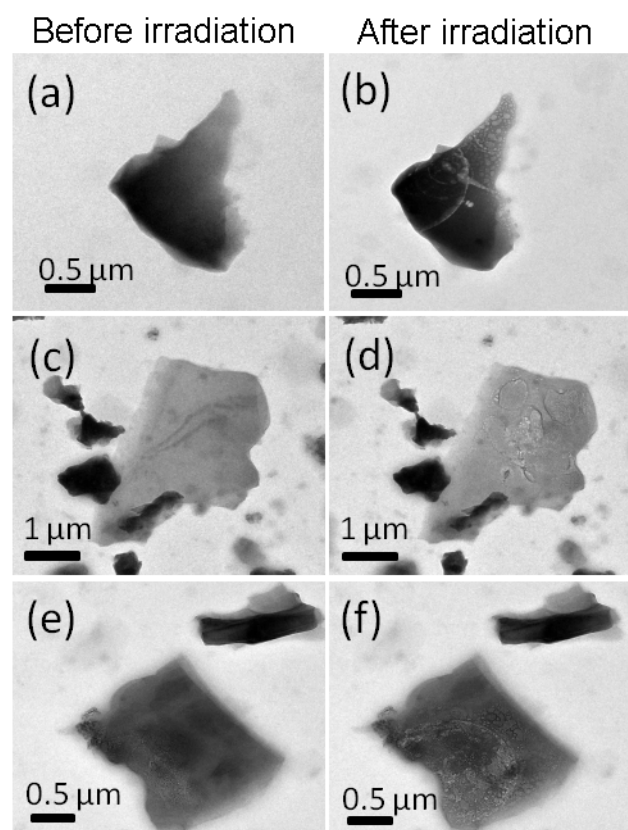

Figure S8: Effect of TEM electron beam on 2D ZnO nanosheet.

Table 1: Effect of growth temperature on height and thickness of 2D ZnO nanosheets.

| Growth temperature (°C) | Avg. height ( $\mu\text{m}$ ) | Avg. thickness (nm) |
|-------------------------|-------------------------------|---------------------|
| 90                      | $6.50 \pm 0.04$               | $84.15 \pm 2.94$    |
| 80                      | $3.03 \pm 0.10$               | $41.99 \pm 2.38$    |
| 70                      | $2.39 \pm 0.02$               | $33.75 \pm 1.69$    |
| 60                      | $2.19 \pm 0.09$               | $22.91 \pm 1.33$    |

Table 2: Detailed quantification data

| Element | Position (eV) | FWHM (eV) | Area (a.u.) | At% (a.u.) |
|---------|---------------|-----------|-------------|------------|
| O 1s    | 530.81        | 3.534     | 14454.48    | 58.27      |
| C 1s    | 284.81        | 3.519     | 2197.62     | 25.96      |
| Zn 2p   | 1020.81       | 3.418     | 20930.71    | 8.61       |
| Al 2p   | 73.81         | 2.740     | 325.30      | 7.16       |

S9:

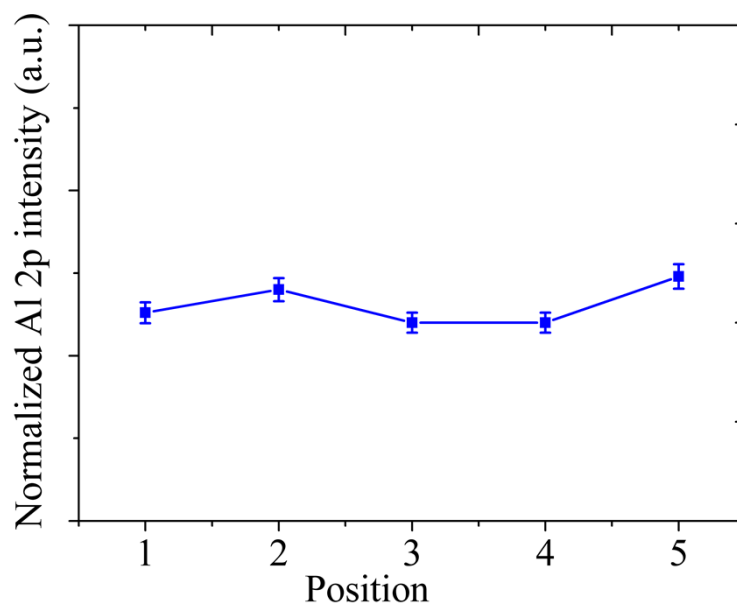

Figure S9: Surface distribution of Al over the ZnO nanosheets.

S10:

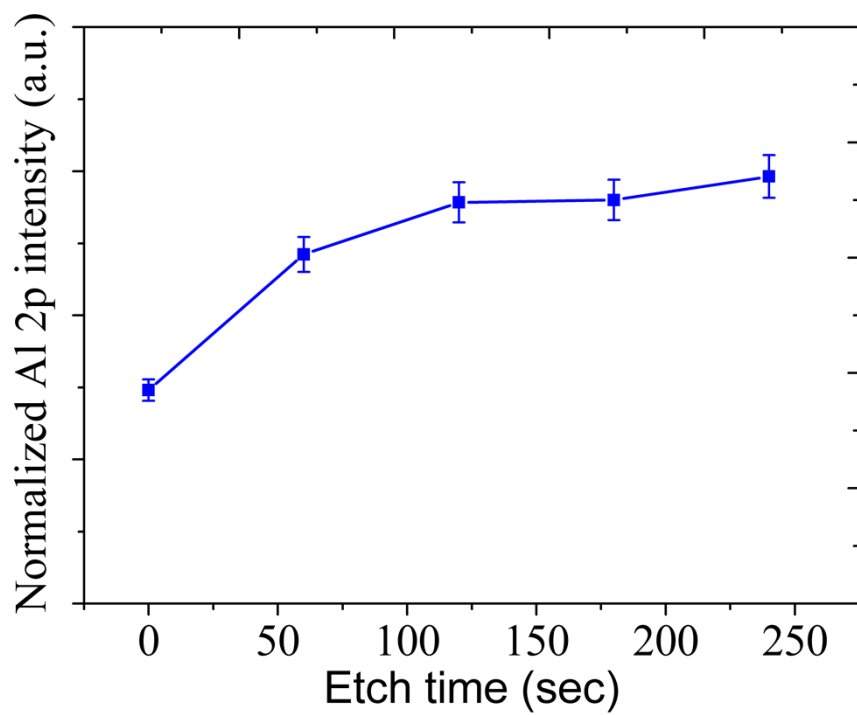

Figure S10: In-depth Al distribution in ZnO nanosheets.
